# Supplementary material
Source: publisher site journal article supplement (https://www.degruyterbrill.com/publication/journal_key/AOFO/downloadAsset/AOFO_Guidelines%20for%20Authors%202024--en.docx)
Supplement: Supplementary file 1 [file AOFO_Guidelines%20for%20Authors%202024--en.docx]

Altorientalische Forschungen

The journal *Altorientalischen Forschungen* publishes original research on the history and culture of the Ancient Near East as well as cultural contacts with neighboring regions such as Central Asia, Egypt and the Aegean. Philological and archaeological (including art historical) investigations are equally welcome. All contributions are peer-reviewed. The journal is published both in print and online.

Guidelines for Authors

Please submit your *manuscript* in both WORD and PDF format to the editorial office (aof@degruyter.com).

*Illustrations, Tables and Charts*:

- are submitted separately rather than embedded in the text, with an indication of where to place them within the main text (ideally together with the captions).
- Line drawings must have a resolution of 1000 dpi, photographs ideally 600 dpi, but at least 300 dpi.
- Please provide appropriate source information for each illustration. The author is responsible for obtaining the required reproduction rights.

*Fonts and Orthography*:

- Please use Unicode fonts, preferably **Times New Roman**.
- German Language contributions follow the new German orthography according to Duden – Die Rechtschreibung, English language contributions follow the Oxford Style Manual or the Chicago Manual of Style.

*Title, Subtitles, Abstract, Keywords and Author’s Details*:

- If the article has a long *title*, please state a short version for the header line.
- It is not possible to include footnotes in the *title* or *subtitles*.
- Each contribution includes an *English abstract* of approximately 80–150 words (8–12 lines) as well as 3–5 thematic *keywords*.
- The *keywords* should be separated from each other by commas, and end without a full stop.
- The author’s name and affiliation with address and email address is listed **at the end** of the contribution.

*Acknowledgements* as well as general information, e.g., particular *abbreviations* used throughout the text, are not listed in the first footnote but after the main text and before the bibliography.

*Bibliographic Abbreviations*

- *Bibliographic abbreviations* generally follow those in the Reallexikon der Assyriologie und Vorderasiatischen Archäologie.
- You can also follow the *abbreviations* used in the following reference works:
  - Archiv für Orientforschung, Akkadisches Handwörterbuch, Chicago Assyrian Dictionary, Chicago Hittite Dictionary, Keilschriftbibliografie of Orientalia, Hethitisches Wörterbuch2 or Deutsches Archäologisches Institut.

If so, these abbreviations must be listed **before** the bibliography.

*Formatting Requirements*:

- Numbers should be written out **in full**, i.e. 264–265 (not 264–5)
- from–to statements should be connected by an **en-dash** not a hyphen, i.e. 264–265 (not 264-265), 1998–2001; iii 5′–7′
- In German, **quotation marks** should be used as follows: „Der ‚Sitz im Leben‘ des Textes ...“
- In English, **quotation marks** should be used as follows: “as it is ‘known’…”
- There is always **punctuation** between two numbers, e.g. BPOA 1, 115 (instead of BPOA 1 115).
- In continuous text, the **character spacing** of isolated Sumerian words should be set to expanded; Akkadian and Hittite words should be *italicized*.
- Please use **′ (prime symbol)** instead of ’ (right single quotation mark) to indicate uncertainty in the line number, e.g. KBo. 1.1 Rs. iii 12′ instead of 12’.
- **Column numbers** should be lowercase.
- Before submission, all internal links should be deleted.

*Transliteration Conventions*:

- In transliterations of entire texts or text passages, Sumerian is written in regular font, Akkadian and Hittite *italicized.*
- For Sumerograms and sign names, small caps should be used; for Akkadograms, *italic small caps*.
- Superscript determinatives should be lowercase.
- **Only subscript index numbers are used** (Unicode and never italicized), e.g. (a₂ und a₃ instead of á und à).

*Bibliographical References and Bibliography*:

- *Bibliographical references* follow the **Author-Date** format and refer to a *Bibliography*.
- References **within the text** include the name of the author(s), followed by **year: page** number in parentheses, e.g., Güterbock (1973: 235) or Reculeau/Feller (2012: 13).
- In footnotes, parentheses are required **only if the reference is embedded in a complete sentence**.
- For in-text references, please refer to authors by **family names only** and indicate page numbers **in full**, e.g., 264–285 rather than 264–85. You may use f. for the following page, but not for several following pages (ff.).
- Names like de Martino, von Soden or Van De Mieroop should appear in the bibliography as they are written in the main text. They should be **alphabetized according to de, von and Van De**.
- In English titles, the first letter of all words apart from prepositions, articles and conjunctions should be in upper case (“**Title Case**”), regardless of whether they are written in upper or lower case in the original publication.
- With respect to **volume numbers**, please avoid using Roman numerals; for journal volumes please include only the volume number (not the issue number).
- Regarding a publication with **more than two** authors or editors, only the first author/editor is named in the text, followed by et al.; in the corresponding bibliographic entry, the names of *all* authors and editors should be included.
- Additional information and the place of publication should be **in the language in which the contribution is written**, not the language of the work cited.
- All references to websites should include a last-access date.

In the bibliography, the formatting of individual entries should correspond to the following examples:

Attinger, P. (2023): Glossaire sumérien-français, principalement des textes littéraires paléobabyloniens. Deuxième édition, revue et augmentée, <https://zenodo.org/records/8369441> (last access 13 February 2024).

Donbaz, V. (2004a): Some Remarkable Contracts of 1-B Period Kültepe Tablets III. In: D. Groddek/S. Rößle (ed.), Šarnikzel. Hethitologische Studien zum Gedenken an Emil Orgetorix Forrer (DBH 10), Dresden, 271–284.

Donbaz, V. (2004b): Some Old Assyrian Texts with Rare Terminology. In: J.G. Dercksen (ed.), Assyria and Beyond. Studies Presented to Mogens Trolle Larsen (PIHANS 100), Leiden, 179–190.

Güterbock, H.G. (1973): Hittite Hieroglyphic Seal Impressions from Korucutepe, JNES 32, 135–147.

Krebernik, M. (1984): Die Beschwörungen aus Fara und Ebla: Untersuchungen zur ältesten keilschriftlichen Beschwörungsliteratur (TSO 2), Hildesheim – Zürich – New York.

Kühne, C./H. Otten (1971): Der Šaušgamuwa-Vertrag (StBoT 16), Wiesbaden.

Llop-Raduà, J. (2010): Rez. zu H. Freydank/B. Feller, Mittelassyrische Rechtsurkunden und Verwaltungstexte VIII (WVDOG 119), Wiesbaden 2007, BiOr. 72, 349–353.

Röllig, W. (2008): Land- und Viehwirtschaft am Unteren Ḫābūr in mittelassyrischer Zeit (BATSH 9), Wiesbaden.

Singer, I. (1999): A Political History of Ugarit. In: W.G.E. Watson/N. Wyatt (ed.), Handbook of Ugaritic Studies (HdOr. 1/39), Leiden – Boston – Köln, 603–733.

*Proper Names*:

- **Place names** follow the transcriptions of the Tübinger Atlas des Vorderen Orients (TAVO).
- **Personal names and names of deities** follow general rules of Assyriology/Hittitology (e.g., Reallexikon der Assyriologie und Vorderasiatischen Archäologie).
- If common/simplified spellings exist, they can be provided in parentheses at the first mention: e.g., Salmānu-ašarēd (Shalmanaser/Salmanassar).
